# Supplementary material
Source: MDPI journal article supplement (https://www.mdpi.com/2073-4441/15/19/3370)
Supplement: s1 [file s1]

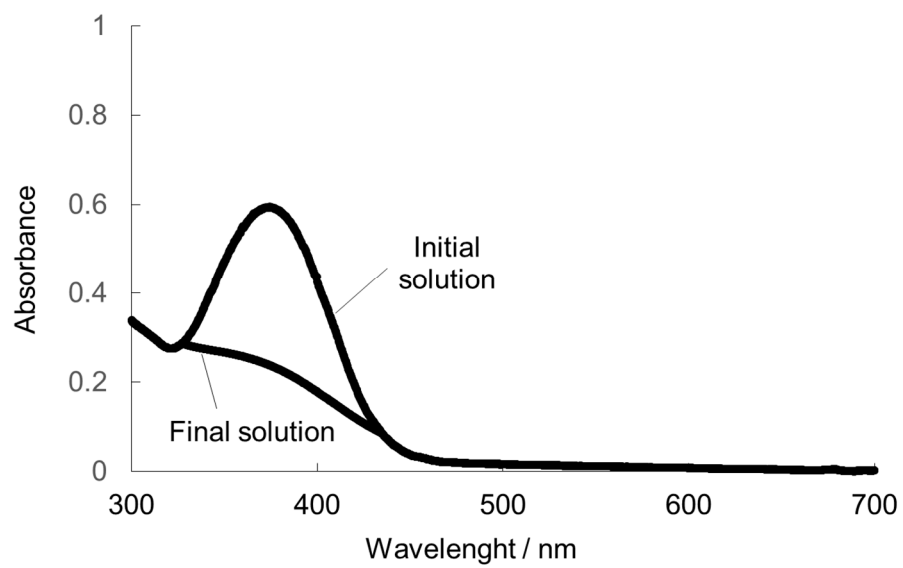

Figure S1. UV-Visible spectra of solution containing 0.14 mM nitrofurazone before and after electrochemical treatment using Pt/Ti anodes ( $I = 0.2$  A). See comments in the text.
